# Supplementary material
Source: publisher figshare collection journal article supplement (https://acs.figshare.com/ndownloader/files/17822732)
Supplement: Supplementary file 1 [file 17822732]

# Supporting Information

## Broadband Optical Absorber Based on Nano-patterned Metallic Glass Thin Films

*Hao Jia<sup>1, 4</sup>, Cheng Jiang<sup>1</sup>, Qingjun Wu<sup>1</sup>, Shumin Yang<sup>2</sup>, Hao Wang<sup>1</sup>, Liansheng Wang<sup>2</sup>, Jun Zhao<sup>2</sup>, Renzhong Ta<sup>2</sup>, Hans-Jörg Fecht<sup>3</sup>, Qingping Cao<sup>4</sup>, Xiaodong Wang<sup>4</sup>, Dongxian Zhang<sup>1,4</sup> \* and Jian-Zhong Jiang<sup>4</sup>\**

1 State Key Laboratory of Modern Optical Instrumentation, Zhejiang University,  
Hangzhou, 310027, People's Republic of China

2 Shanghai Institute of Applied Physics, Chinese Academy of Sciences, Shanghai,  
201204, People's Republic of China

3 Institute of Functional Nanosystems FNS, Ulm University, Albert-Einstein-Allee 47,  
89081 Ulm, Germany

4 International Center for New-Structured Materials, State Key Laboratory of Silicon  
Materials and School of Materials Science and Engineering, Zhejiang University,  
Hangzhou, 310027, People's Republic of China

Corresponding Author: [zhangdx@zju.edu.cn](mailto:zhangdx@zju.edu.cn) and [jiangjz@zju.edu.cn](mailto:jiangjz@zju.edu.cn)

Figure S1 shows the XRD diffraction pattern of the as-sputtered CuZrAl MGTF on Si wafer, which is characteristic of amorphous structure. The  $n$  (the refractive index) and  $k$  (the extinction coefficient) values of CuZrAl MGTF are measured by variable angle spectroscopic ellipsometry in Figure S2. In Fig. S3, we calculate absorption behaviors of absorbers ( $D = 250$  nm,  $P = 500$  nm,  $H = 60$  nm) with different materials of top and bottom layers. The absorber made with CuZrAl MGTF has far superior absorption behavior as compared to Cu, Al, Ag and Nb.

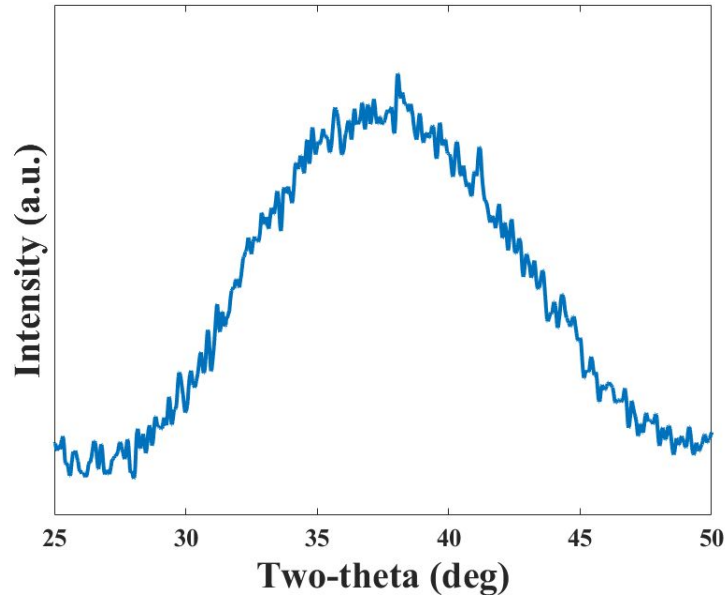

Figure S1. XRD diffraction pattern of the as-deposited 100 nm thick CuZrAl MGTF on Si wafer.

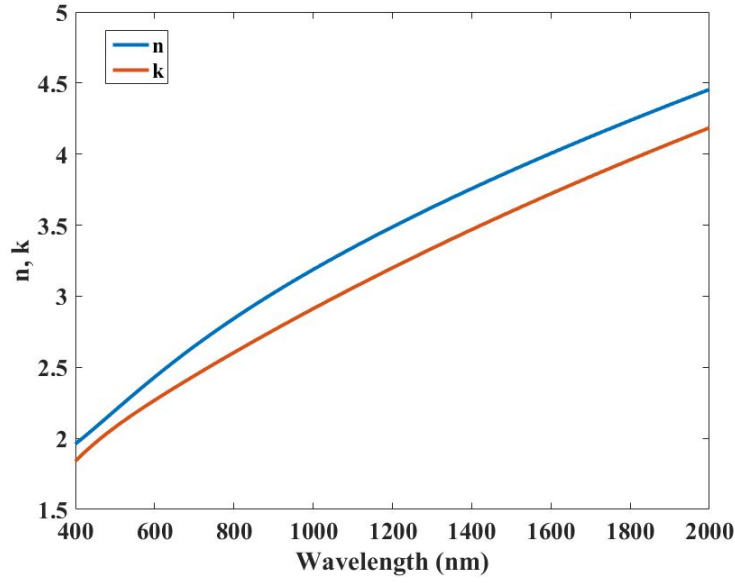

Figure S2. Refractive index and extinction coefficient dispersions of the CuZrAl MGTF measured by variable angles spectroscopic ellipsometry.

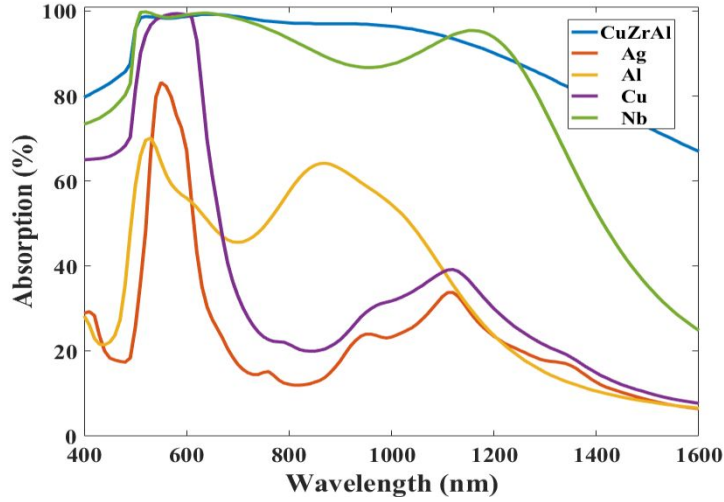

Figure S3. Absorption behaviors of our device made with different materials. Note that we could not find the  $n$  and  $k$  values for pure Zr material. Thus, we calculated absorption behavior of the neighbor element of Nb instead.

For the preparation of CuZrAl absorber, a 100 nm-thick CuZrAl MGTF was deposited on Si wafer by a direct-current magnetron sputtering system (DCMS, JZCK-400) in a vacuum of  $5 \times 10^{-4}$  Pa chamber under purified argon atmosphere. A 70 nm-thick SiO<sub>2</sub> layer was then deposited on

the MGTf by electron beam evaporation (Balzers, BAK600) at room temperature. The CuZrAl nanodisks on SiO<sub>2</sub> layer were fabricated by electron-beam lithography (EBL) systems (CRESTED CABL-9000C).

All numerical simulation results were obtained by Finite-Difference Time-Domain (FDTD) method using Lumerical commercial software package (FDTD solutions). In order to fully absorb scattered light, perfect matched layer (PML) boundary conditions were used in the top and bottom Z planes, while symmetric or anti-symmetric boundary conditions were applied in the X and Y planes to obtain the periodic structure and reduce the computing time. The reflectance R was measured at normal incidence by using a Fourier transform infrared spectrometer (FTIR Vertex 70). For negligible transmission, i.e., the measured transmission was lower than 0.01, absorption  $A=1-R$ . The microstructure was monitored by field-emission scanning electron microscopy (FE-SEM, Hitachi S-4800). Optical microscope images of the absorber were measured using a microscope (Nikon 80i).
